# Supplementary material for: Exopolysaccharide β-(2,6)-levan-type fructans have a molecular-weight-dependent modulatory effect on Toll-like receptor signalling
Source: Royal Society of Chemistry journal article supplement (doi:10.1039/d3fo03066k), 2023-12-18
Supplement: d3fo03066k1.pdf [file d3fo03066k1.pdf]

## Supplementary tables and figures

### Exopolysaccharide $\beta$ -(2,6)-levan-type fructans have a molecular-weight-dependent modulatory effect on Toll-Like Receptor signalling

Renate Akkerman <sup>1\*</sup>, Marjolein M. P. Oerlemans <sup>1\*</sup>, Michela Ferrari <sup>2</sup>, Cynthia Fernández-Lainez <sup>1,3,4</sup>,  
Bart J. de Haan <sup>1</sup>, Marijke M. Faas <sup>1</sup>, Marthe T. C. Walvoort <sup>2</sup> and Paul de Vos <sup>1</sup>

#### Supplementary table 1. Cell densities and positive controls used in reporter cell stimulation experiments

| Cell line      | Cell Density                 | Agonist                                                          | Agonist concentration    |
|----------------|------------------------------|------------------------------------------------------------------|--------------------------|
| THP-1MD2-CD14  | 1*10 <sup>6</sup> cells/mL   | <i>E.coli</i> K12 lipopolysaccharide (LPS)<br>Ultrapure          | 100 ng/mL                |
| THP-1 DefMyD   | 2*10 <sup>6</sup> cells/mL   | L-Ala-gamma-D-Glu-mDAP (TriDAP)                                  | 10 µg/mL                 |
| HEK-Blue hTLR2 | 2.8*10 <sup>5</sup> cells/mL | Heat-killed <i>Listeria monocytogenes</i> (HKLM)                 | 10 <sup>7</sup> cells/mL |
| HEK-Blue hTLR3 | 2.8*10 <sup>5</sup> cells/mL | Poly(I:C) high molecular weight                                  | 1 mg/mL                  |
| HEK-Blue hTLR4 | 1.4*10 <sup>5</sup> cells/mL | <i>E.coli</i> K12 lipopolysaccharide (LPS)<br>Ultrapure          | 10 ng/mL                 |
| HEK-Blue hTLR5 | 1.4*10 <sup>5</sup> cells/mL | Recombinant flagellin from <i>S. typhimurium</i><br>(Rec-FLA-ST) | 100 ng/mL                |
| HEK-Blue hTLR7 | 2.2*10 <sup>5</sup> cells/mL | Imiquimod                                                        | 5 µg/mL                  |
| HEK-Blue hTLR8 | 2.2*10 <sup>5</sup> cells/mL | Single stranded RNA (ssRNA40/LyoVec TM)                          | 5 µg/mL                  |
| HEK-Blue hTLR9 | 4.5*10 <sup>5</sup> cells/mL | Type B CpG oligonucleotide (ODN 2006)                            | 100 mg/mL                |

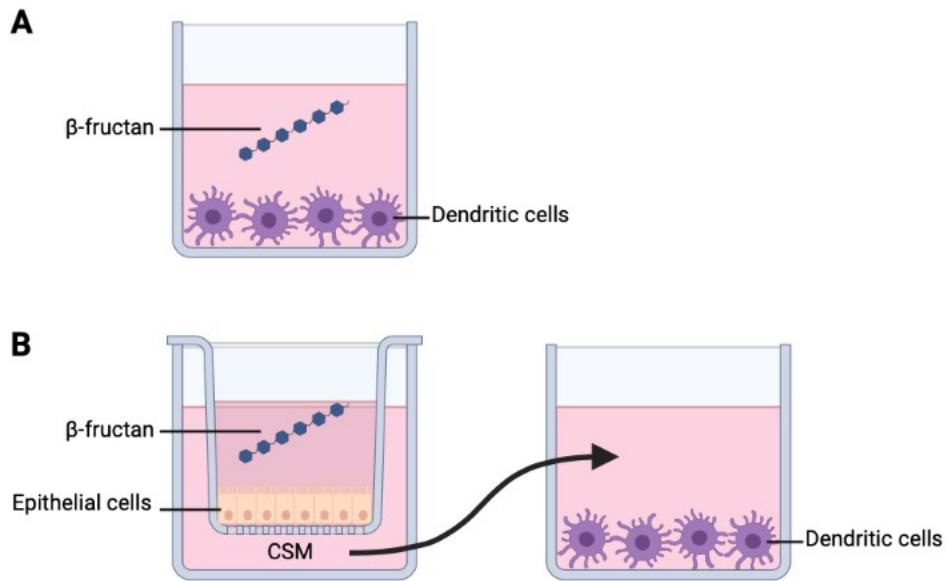

**Supplementary figure 1: Design of the *in vitro* DC experiments.** (A) DCs were incubated with  $\beta$ -fructans for 48 h to investigate their stimulatory properties and (B) to investigate the effect of soluble epithelial factors in response to incubation with  $\beta$ -fructans on DCs, Caco-2 cells were cultured on trans well inserts and incubated with  $\beta$ -fructans for 24 h on the apical side. Subsequently, Caco-spent medium (CSM) from the basolateral basin was incubated with DCs for another 48 h. DC supernatants were analyzed for cytokine production.

**Supplementary table 2: Data under detection limit**

| Cytokine    | Lower detection limit (µg/mL) | Interpretated value (µg/mL) |
|-------------|-------------------------------|-----------------------------|
| MCP-1/CCL2  | -                             | -                           |
| MIP-1α/CCL3 | 13,4979                       | 1,34979                     |
| IL-1β       | 2,97668                       | 0,297668                    |
| IL-1RA      | 4645                          | 464,5                       |
| IL-6        | 6,17284                       | 0,617284                    |
| IL-10       | 5,28121                       | 0,528121                    |
| TNFα        | 3,29218                       | 0,329218                    |

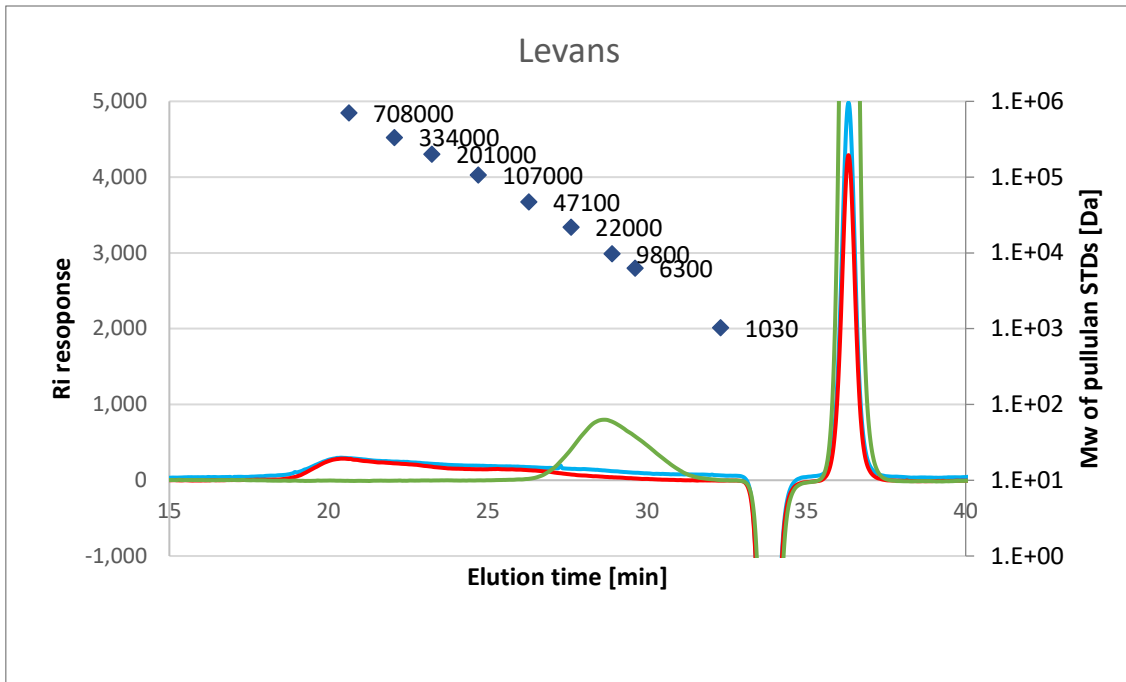

**Supplementary figure 2: Molecular weight determination of the Levans included in this study measured by gel permeation chromatography (GPC). IMw  $\beta$ -(2,6)-fructan is represented in green. mMw  $\beta$ -(2,6)-fructan is represented in red and the hMw  $\beta$ -(2,6)-fructan is represented in blue. Blue dots on top of the plot represent the pullulan STDs.**
